# Supplementary material
Source: PubMed Central journal article supplement (PMC3657845)
Supplement: NIHMS451559-supplement-01.pdf [file NIHMS451559-supplement-01.pdf]

## Supplementary Material

### Western blots

Log phase cultures of JSY1505 (*msh3Δ* derivative of EAY33<sup>26</sup>) carrying wild-type *MSH2* (pMMR8<sup>79</sup>) and either *MSH3* (pMMR20<sup>79</sup>) or *msh3* allele overexpression plasmids were grown up in the presence of 2% lactate and 2% glycerol (strains used are listed in Table S6). Protein expression was induced by the addition of 2% galactose. Cells were harvested and lysed as described previously.<sup>26</sup> JSY1505 was used as negative control and partially purified Msh3 protein was used as a positive control. Cleared lysates were separated by SDS-PAGE and transferred to Bio-Rad nitrocellulose membranes (0.45μM) using a semi-dry transfer cell (Bio-Rad). The membrane was blocked for an hour in 10% milk and then incubated with the 1:1000 diluted primary α-Msh3 antibody (Santa Cruz Biotechnology) overnight at 4°C. This was followed by incubation with 1:10,000 diluted horseradish peroxidase conjugated rabbit anti-goat antibody (Thermo Scientific) for 20 minutes. The blot was then treated, as directed, with Western Bright<sup>TM</sup> Quantum (Advansta). The membrane was developed on Chemi-doc MP (Bio-Rad) and the Msh3 bands were quantified using ImageLab (Bio-Rad). The amount of Msh3 or *msh3* mutant protein in each lane was normalized to the same non-specific band that appears in all lanes, including the strain that does not carry an overexpression plasmid.

**Figure S1: Western blot of *msh3* proteins.** Wild-type *MSH3* and the *msh3* alleles were overexpressed (strains are provided in Table S6). Cleared lysate was obtained, separated by SDS PAGE, transferred onto nitrocellulose membrane and Msh3 was probed with goat α-Msh3 antibody. Partially purified Msh3 was used as positive control (arrow) and the strain with no *MSH3* plasmid (empty) was used as negative control. **(a)** Alleles carrying R744A, P774A, G795A, G796A and Y942A mutations were detected. **(b)** P745A, R761A, N762A and F940A *msh3* alleles were detected. **(c)** R744L, P745L, R761L, N762L, P774L, G795D, G796D and Y925A *msh3* mutations were detected. **The upper row in each panel shows Msh3 and *msh3***

protein levels. The lower row in each panel is a non-specific band present in all lanes that was used as a loading control. All of the sections in each panel are from the same blot and exposure. Numbers below the blot represent fold differences in level of expression relative to the wild-type control on the same blot.

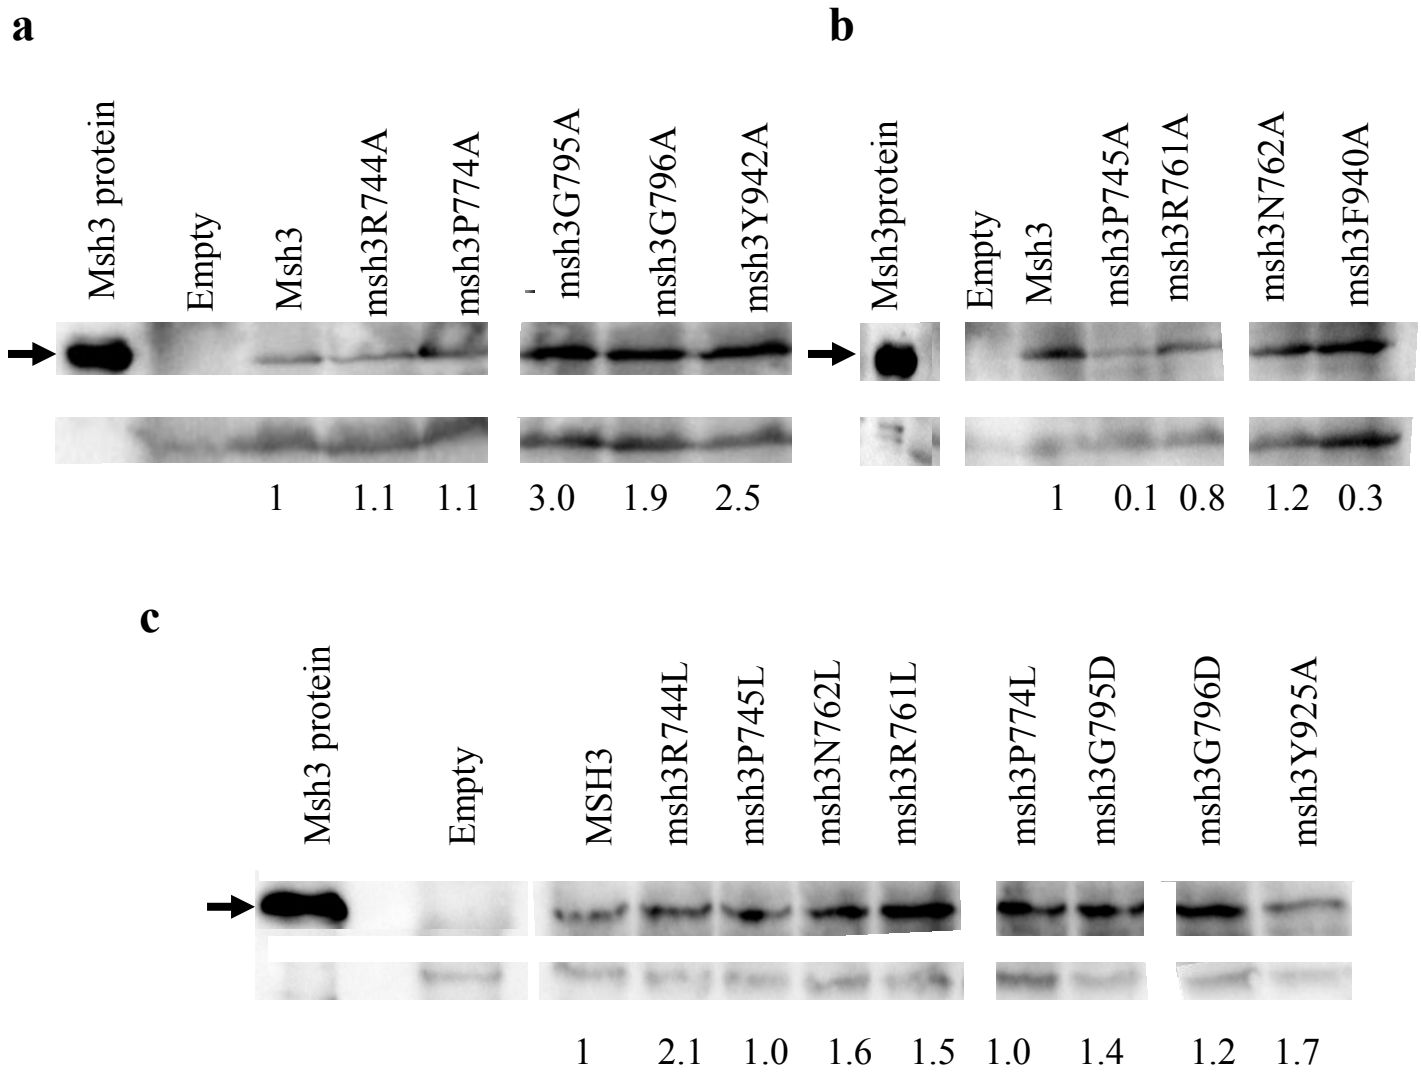

**Fig. S1**

**Supplementary Table1:** Parental strains used in this study.

| Strain               | Genotype                                                                                                                | Reference  |
|----------------------|-------------------------------------------------------------------------------------------------------------------------|------------|
| EAY1042              | <i>Δho, HMLα MATa::KanMX hmrΔ::ADE1 ade1-100 leu2-3 lys5 trp1::hisG ura3-52 ade3::Gal::HO MSH2-HA<sub>4</sub>::LEU2</i> | 1          |
| EAY1118 <sup>a</sup> | EAY 1042 <i>msh3Δ::hisG</i>                                                                                             | 1          |
| FY23 <sup>b</sup>    | <i>MATa ura3-52 leu2Δ1 trp1Δ63</i>                                                                                      | 2          |
| FY86 <sup>b</sup>    | <i>MATα ura3-52 leu2Δ1 his3Δ200</i>                                                                                     | 2          |
| EAY420 <sup>c</sup>  | <i>ura3-52 leu2Δ1 trp1Δ63 msh3Δ::hisG</i>                                                                               | 3          |
| JSY1505 <sup>d</sup> | <i>ura3-52 trp1 leu2Δ1 his3Δ200 pep4::HIS3 prb1Δ1.6R can1 GAL msh3Δ::hisG</i>                                           | This study |
| EAY1125              | <i>ura3-52 trp1 leu2Δ1 his3Δ200 pep4::HIS3 prb1Δ1.6R can1 GAL pMMR20 pMMR8<sup>e</sup></i>                              | 4          |
| GCY559               | <i>ade2-101c his3Δ ura3-Nhe lys2ΔRV::hisG leu2-R-(HIS3::intron::cb2-4L IR)-LEU2 Gal+</i>                                | 5          |
| EAY1613              | <i>GCY559 msh2Δ::hisG-URA3::hisG</i>                                                                                    | 6          |
| EAY1625 <sup>f</sup> | <i>GCY559 msh3Δ::hisG-URA3::hisG</i>                                                                                    | 6          |

<sup>a</sup> *msh3Δ* strain used to measure 3'NHTR and MMR of *msh3* alleles in Table 1.

<sup>b</sup> *MATa* and *MATα* strains used to determine mating type switching. FY23 also used for dominant negative tests in Table 3.

<sup>c</sup> *msh3Δ* used to perform mutational analysis in Table 2.

<sup>d</sup> Protease deficient and *msh3Δ* strains used to perform Western blots.

<sup>e</sup> Protease deficient strain overexpressing *MSH2* and *MSH3* used as a positive control in Western blots.

<sup>f</sup> *msh3Δ* strains used to assay heteroduplex rejection in Table 4.

**Supplementary Table 2: Oligonucleotides used for site directed mutagenesis.**

| <i>msh3</i> allele | Oligo name | Sequence                                                |
|--------------------|------------|---------------------------------------------------------|
| <i>msh4</i>        | SO234      | 5'-GTAAATTATGTTGCACCAACTTTTGTGAAT-3'                    |
| <i>R744A</i>       | SO235      | 5'-ATTCACAAAAGTTGGTGCAACATAATTTAC-3'                    |
| <i>msh3</i>        | SO480      | 5'-TGCAACGTAAATTATGTTCTACCAACTTTTGTGAAT-3'              |
| <i>R744L</i>       | SO481      | 5'-ATTCACAAAAGTTGGTAGAACATAATTTACGTTGCA-3'              |
| <i>msh3</i>        | SO236      | 5'-GTAAATTATGTTAGAGCAACTTTTGTGAAT-3'                    |
| <i>P745A</i>       | SO237      | 5'-ATTCACAAAAGTTGCTCTAACATAATTTAC-3'                    |
| <i>msh3</i>        | SO482      | 5'-TGCAACGTAAATTATGTTAGACTAACTTTTGTGAAT-3'              |
| <i>P745L</i>       | SO483      | 5'-ATTCACAAAAGTTAGTCTAACATAATTTACGTTGCA-3'              |
| <i>msh3</i>        | SO222      | 5'-GCAAAAAATGCAGCAAATCCAATTATC-3'                       |
| <i>R761A</i>       | SO223      | 5'-GATAATTGGATTTGCTGCATTTTTTGC-3'                       |
| <i>msh3</i>        | SO484      | 5'-ATCGCAAAAAATGCACTAAATCCAATTATCGAGTCG-3'              |
| <i>R761L</i>       | SO485      | 5'-CGACTCGATAATTGGATTTAGTGCATTTTTTGCAT-3'               |
| <i>msh3</i>        | SO389      | 5'-GCAAAAAATGCAAGAGCTCCAATTATCGAGTCGCTG-3'              |
| <i>N762A</i>       | SO340      | 5'-CAGCGACTCGATAATTGGAGCTCTTGCATTTTTTGC-3'              |
| <i>msh3</i>        | SO486      | 5'-ATCGCAAAAAATGCAAGACTTCCAATTATCGAGTCG-3'              |
| <i>N762L</i>       | SO487      | 5'-CGACTCGATAATTGGAAGTCTTGCATTTTTTGCAT-3'               |
| <i>msh3</i>        | SO220      | 5'-GTTTCATTATGTAGCAAATGATATCATG-3'                      |
| <i>P774A</i>       | SO221      | 5'-CATGATATCATTTGCTACATAATGAAC-3'                       |
| <i>msh3</i>        | SO488      | 5'-GATGTTTCATTATGTACTAAATGATATCATGATGTCC-3'             |
| <i>P774L</i>       | SO489      | 5'-GGACATCATGATATCATTTAGTACATAATGAACATC-3'              |
| <i>msh3</i>        | SO383      | 5'-GAGGACTGGATGAGTGTAATTGCTCTATATAAGTTAAAAAAGGGATTG-3'  |
| <i>F940A</i>       | SO384      | 5'-CAATCCCTTTTTTA ACTTATATAGAGCAATTACACTCATCCAGTCCTC-3' |
| <i>msh3</i>        | SO385      | 5'-TGGATGAGTGTAATTTTTCTAGCTAAGTTAAAAAAGGGATTGACTTAT-3'  |
| <i>Y942A</i>       | SO386      | 5'-ATAAGTCAATCCCTTTTTTA ACTTAGCTAGAAAAATTACACTCATCCA-3' |

|              |       |                                            |
|--------------|-------|--------------------------------------------|
| <i>msh3</i>  | SO494 | 5'-AGGAATTATCATATGGATGCCGTGGAAGAACAAAAA-3' |
| <i>Y925A</i> | SO495 | 5'-TTTTTGTTCTTCCACGGCATCCATATGATAATTCCT-3' |
| <i>msh3</i>  | SO286 | 5'-GGGCCGAATATGGCTGGGAAATCATCT-3'          |
| <i>G795A</i> | SO287 | 5'-AGATGATTTCCCAGCCATATTCGGCCC-3'          |
| <i>msh3</i>  | SO490 | 5'-ACGGGGCCGAATATGGATGGGAAATCATCTTATATT-3' |
| <i>G795D</i> | SO491 | 5'-AATATAAGATGATTTCCCATCCATATTCGGCCCCGT-3' |
| <i>msh3</i>  | SO387 | 5'-CGGGGCCGAATATGGGTGCGAAATCATCTTATATTA-3' |
| <i>G796A</i> | SO388 | 5'-CTAATATCCGATGATTTCGCACCCATATTCGGCCCC-3' |
| <i>msh3</i>  | SO492 | 5'-ACGGGGCCGAATATGGGTGATAAATCATCTTATATT-3' |
| <i>G796D</i> | SO493 | 5'-AATATAAGATGATTTATCACCCATATTCGGCCCCGT-3' |

---

**Supplementary Table 3:** Plasmids used in this study.

| <i>msh3</i> allele  | Plasmid | Overexpression Plasmid |
|---------------------|---------|------------------------|
| <i>MSH3</i>         | pGW2    | pMMR20                 |
| <i>msh3R744A</i>    | pCK17   | pBC2                   |
| <i>msh3R744L</i>    | pCK70   | pCK95                  |
| <i>msh3P745A</i>    | pCK18   | pCK96                  |
| <i>msh3P745L</i>    | pCK71   | pCK88                  |
| <i>msh3R761A</i>    | pCK21   | pCK97                  |
| <i>msh3R761L</i>    | pCK80   | pCK89                  |
| <i>msh3N762A</i>    | pCK40   | pCK41                  |
| <i>msh3N762L</i>    | pCK81   | pCK90                  |
| <i>msh3P774A</i>    | pCK20   | pBC1                   |
| <i>msh3P774L</i>    | pCK72   | pCK91                  |
| <i>msh3G795A</i>    | pCK35   | pBC4                   |
| <i>msh3G795D</i>    | pCK82   | pCK92                  |
| <i>msh3G796A</i>    | pCK38   | pCK42                  |
| <i>msh3G796D</i>    | pCK83   | pCK93                  |
| <i>msh3F940A</i>    | PCK36   | pCK44                  |
| <i>msh3Y942A</i>    | pCK37   | pCK43                  |
| <i>msh3Y925A</i>    | pCK84   | pCK94                  |
| <i>Empty Vector</i> | pEAA378 |                        |

**Supplementary Table 4:** Strains used for double strand break repair.

| <i>msh3</i> allele in EAY1118 background | Strains for DSBR assay | Strains for slippage assay |
|------------------------------------------|------------------------|----------------------------|
| <i>MSH3</i>                              | JSY1443-45             | JSY2402-04                 |
| <i>msh3R744A</i>                         | JSY1455-57             | JSY2408-10                 |
| <i>msh3R744L</i>                         | JSY2478-80             | -                          |
| <i>msh3P745A</i>                         | JSY1458-60             | JSY2411-13                 |
| <i>msh3P745L</i>                         | JSY2481-83             | -                          |
| <i>msh3R761A</i>                         | JSY1660-62             | JSY2381-83                 |
| <i>msh3R761L</i>                         | JSY2487-89             | JSY2487-89                 |
| <i>msh3N762A</i>                         | JSY2299-2301           | JSY2393-95                 |
| <i>msh3N762L</i>                         | JSY2490-92             | -                          |
| <i>msh3P774A</i>                         | JSY1657-59             | JSY2375-77                 |
| <i>msh3P774L</i>                         | JSY2484-86             | -                          |
| <i>msh3G795A</i>                         | JSY2216-18             | JSY2384-86                 |
| <i>msh3G795D</i>                         | JSY2493-95             | -                          |
| <i>msh3G796A</i>                         | JSY2296-98             | JSY2390-92                 |
| <i>msh3G796D</i>                         | JSY2496-98             | -                          |
| <i>msh3F940A</i>                         | JSY2317-19             | JSY2396-98                 |
| <i>msh3Y942A</i>                         | JSY2293-95             | JSY2387-89                 |
| <i>msh3Y925A</i>                         | JSY2499-2501           | -                          |
| <i>Empty Vector</i>                      | JSY1452-44             | JSY2405-07                 |



**Supplementary Table 5:** Strains used to determine mutation rates.

| <i>msh3</i> allele in EAY420 background | Slippage assay strains<br>Tetranucleotide repeat | Slippage assay strains<br>Dinucleotide repeat |
|-----------------------------------------|--------------------------------------------------|-----------------------------------------------|
| <i>MSH3</i>                             | JSY1624-26                                       | JSY2320-22                                    |
| <i>msh3R744A</i>                        | JSY1630-32                                       | JSY2323-35                                    |
| <i>msh3R744L</i>                        | JSY2454-56                                       | -                                             |
| <i>msh3P745A</i>                        | JSY1633-35                                       | -                                             |
| <i>msh3P745L</i>                        | JSY2457-59                                       | -                                             |
| <i>msh3R761A</i>                        | JSY1639-41                                       | -                                             |
| <i>msh3R761L</i>                        | JSY2463-65                                       | -                                             |
| <i>msh3N762A</i>                        | JSY2314-16                                       | -                                             |
| <i>msh3N762L</i>                        | JSY2466-68                                       | -                                             |
| <i>msh3P774A</i>                        | JSY1657-59                                       | -                                             |
| <i>msh3P774L</i>                        | JSY2460-62                                       | -                                             |
| <i>msh3G795A</i>                        | JSY1648-53                                       | JSY2429-31                                    |
| <i>msh3G795D</i>                        | JSY2469-71                                       | -                                             |
| <i>msh3G796A</i>                        | JSY2311-13                                       | JSY2372-74                                    |
| <i>msh3G796D</i>                        | JSY2472-74                                       | -                                             |
| <i>msh3F940A</i>                        | JSY2317-19                                       | JSY2366-68                                    |
| <i>msh3Y942A</i>                        | JSY2308-10                                       | JSY2369-71                                    |
| <i>msh3Y925A</i>                        | JSY2475-77                                       | -                                             |
| <i>Empty Vector</i>                     | JSY1627-29                                       | JSY2426-28                                    |

**Supplementary Table 6:** Strains used for Western blots.

| <i>msh3</i> allele in JSY1505 background | Overexpression strain |
|------------------------------------------|-----------------------|
| <i>msh3R744A</i>                         | JSY2117               |
| <i>msh3R744L</i>                         | JSY2523               |
| <i>msh3P745A</i>                         | JSY2526               |
| <i>msh3P745L</i>                         | JSY2502               |
| <i>msh3R761A</i>                         | JSY2529               |
| <i>msh3R761L</i>                         | JSY2505               |
| <i>msh3N762A</i>                         | JSY2532               |
| <i>msh3N762L</i>                         | JSY2508               |
| <i>msh3P774A</i>                         | JSY1799               |
| <i>msh3P774L</i>                         | JSY2511               |
| <i>msh3G795A</i>                         | JSY2109               |
| <i>msh3G795D</i>                         | JSY2514               |
| <i>msh3G796A</i>                         | JSY2329               |
| <i>msh3G796D</i>                         | JSY2517               |
| <i>msh3F940A</i>                         | JSY2535               |
| <i>msh3Y942A</i>                         | JSY2332               |
| <i>msh3Y925A</i>                         | JSY2520               |

**Supplementary Table 7:** Strains used to determine dominant negative phenotypes.

| <i>msh3</i> allele in<br>FY23 background | Low copy plasmid | Overexpression plasmid |
|------------------------------------------|------------------|------------------------|
| <i>MSH3</i>                              | JSY1699-1701     | JSY2432-33             |
| <i>msh3R744A</i>                         | JSY1676-78       | JSY2434-36             |
| <i>msh3P745A</i>                         | JSY1679-84       | -                      |
| <i>msh3 R744L</i>                        | -                | JSY2599-2601           |
| <i>msh3P745L</i>                         | -                | JSY2602-04             |
| <i>msh3R761A</i>                         | JSY1685-87       | -                      |
| <i>msh3P774A</i>                         | JSY1688-1700     | -                      |
| <i>msh3G795A</i>                         | JSY1702-04       | -                      |
| <i>msh3G796A</i>                         | JSY2399-2401     | JSY2437-39             |
| <i>msh3Y925A</i>                         | -                | JSY2605-07             |
| <i>msh3F940A</i>                         | -                | JSY2441-43             |

**Supplementary Table 8:** Strains used to determine rates of homeologous recombination.

| <i>msh3</i> allele in EAY1625 background | Strains    |
|------------------------------------------|------------|
| <i>MSH3</i>                              | JSY2575-77 |
| <i>Empty Vector</i>                      | JSY2560-62 |
| <i>msh3R744L</i>                         | JSY2563-65 |
| <i>msh3Y942A</i>                         | JSY2572-74 |
| <i>msh3F940A</i>                         | JSY2596-98 |
| <i>msh3Y925A</i>                         | JSY2566-68 |
| <i>msh3G795D</i>                         | JSY2578-80 |

## Supplementary References

1. Lyndaker, A. M., Goldfarb, T. & Alani, E. (2008). Mutants Defective in Rad1-Rad10-Slx4 Exhibit a Unique Pattern of Viability During Mating-Type Switching in *Saccharomyces cerevisiae*. *Genetics* 179, 1807-1821.
2. Winston, F., Dollard, C. & SL, R.-H. (1995). Construction of a set of convenient *Saccharomyces cerevisiae* strains that are isogenic to S288C. *Yeast* 11, 53-55.
3. Studamire, B., Quach, T. & Alani, E. (1998). *Saccharomyces cerevisiae* Msh2p and Msh6p ATPase Activities Are Both Required during Mismatch Repair. *Mol. Cell. Biol.* 18, 7590-7601.
4. Surtees, J. A. & Alani, E. (2006). Mismatch Repair Factor MSH2-MSH3 Binds and Alters the Conformation of Branched DNA Structures Predicted to form During Genetic Recombination. *Journal of Molecular Biology* 360, 523-536.
5. Nicholson, A., Hendrix, M., Jinks-Robertson, S. & Crouse, G. F. (2000). Regulation of Mitotic Homeologous Recombination in Yeast: Functions of Mismatch Repair and Nucleotide Excision Repair Genes. *Genetics* 154, 133-146.
6. Lee, S. D., Surtees, J. A. & Alani, E. (2007). *Saccharomyces cerevisiae* MSH2-MSH3 and MSH2-MSH6 Complexes Display Distinct Requirements for DNA Binding Domain I in Mismatch Recognition. *Journal of Molecular Biology* 366, 53-66.
